# Supplementary material
Source: PubMed Central journal article supplement (PMC4432148)
Supplement: AAC.05128-14_zac006154026so1.pdf [file AAC.05128-14_zac006154026so1.pdf]

**Supplemental Table S1.** Population pharmacokinetic parameter estimates of RPT and desRPT.

| <b>Parameter</b>                                                            | <b>Estimate</b> | <b>%RSE</b> |
|-----------------------------------------------------------------------------|-----------------|-------------|
| CL (liters/h)                                                               | 1.13            | 6           |
| V (liters)                                                                  | 33              | 7           |
| K <sub>a</sub> (h <sup>-1</sup> )                                           | 0.83            | 7           |
| MTT(h)                                                                      | 1.1             | 30          |
| Food on bioavailability                                                     | 1.31            | -           |
| Bioavailability for 1500 and 1800 mg dose                                   | 0.65            |             |
| Bioavailability for 1200 and 1350 mg dose                                   | 0.82            | -           |
| CL <sub>m</sub> /F <sub>m</sub>                                             | 1.6             | 5           |
| V <sub>m</sub> /F <sub>m</sub>                                              | 4.2             | 13          |
| <b>Interindividual Variability (%CV)</b>                                    |                 |             |
| η <sub>CL</sub>                                                             | 26              | 25          |
| Π <sub>F</sub>                                                              | 24              | 31          |
| η <sub>CLm</sub>                                                            | 25              | 12          |
| Covariance η <sub>CL</sub> ~ η <sub>v</sub><br>(covariance and correlation) | 0.0684(0.98)    |             |
| <b>Residual variability</b>                                                 |                 |             |
| Proportional error for rifapentine                                          | 0.62            | 3           |
| Proportional error for desRPT                                               | 0.66            | 4           |
